# Supplementary material
Source: MDPI journal article supplement (https://www.mdpi.com/2673-1924/3/3/26)
Supplement: s1 [file s1]

Archive with 1 entries (1 files):
- oceans-1729627-supplementary.pdf
